# Supplementary material
Source: PubMed Central journal article supplement (PMC2000499)

A.

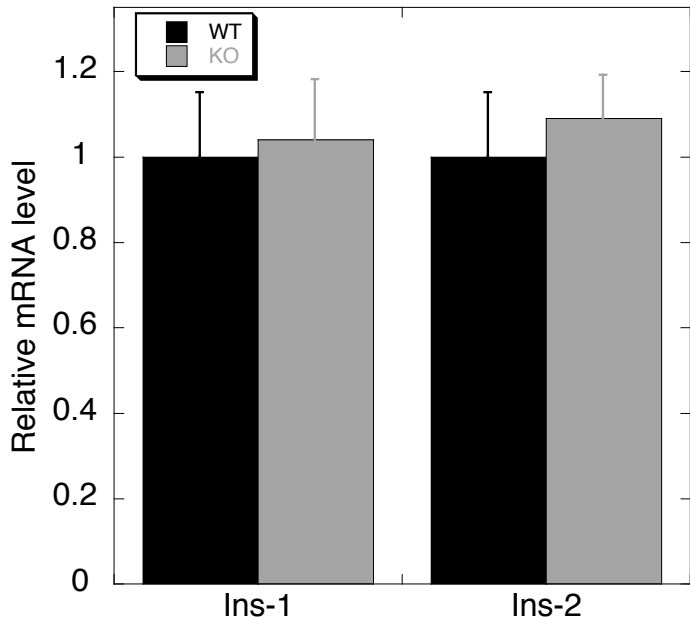

B.

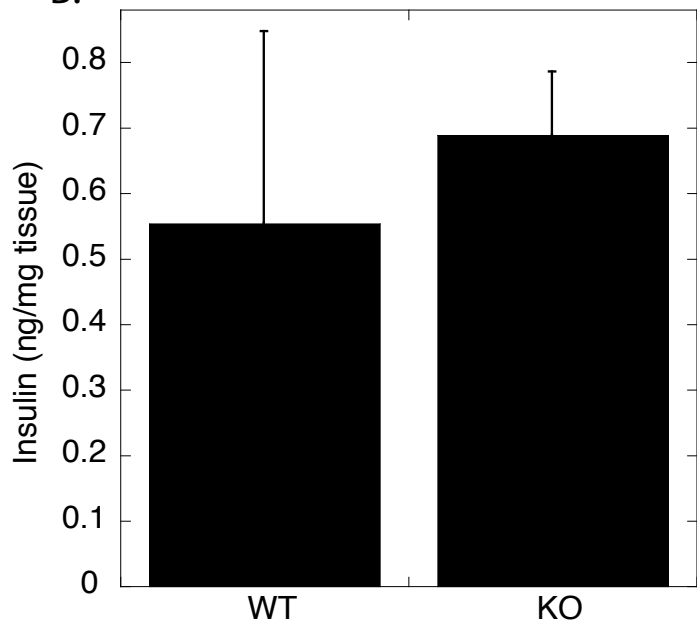

Supplement: pnas_0705407104_1.pdf [file pnas_0705407104_1.pdf]

A.

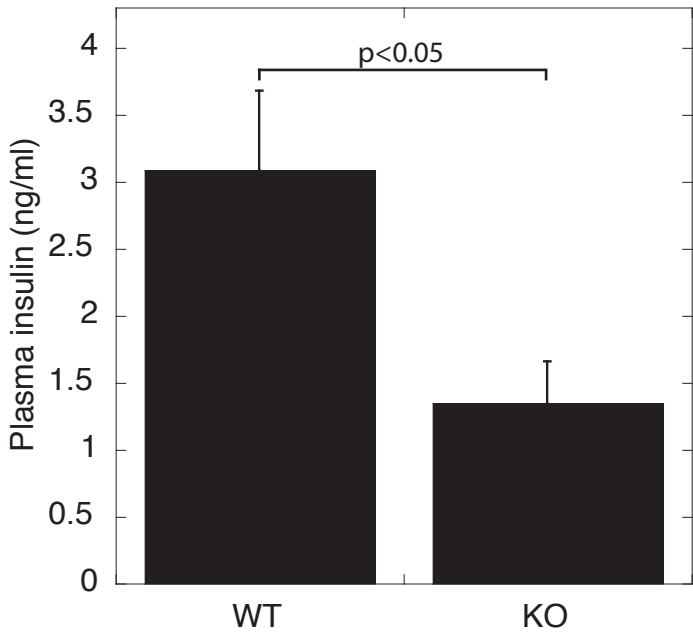

B.

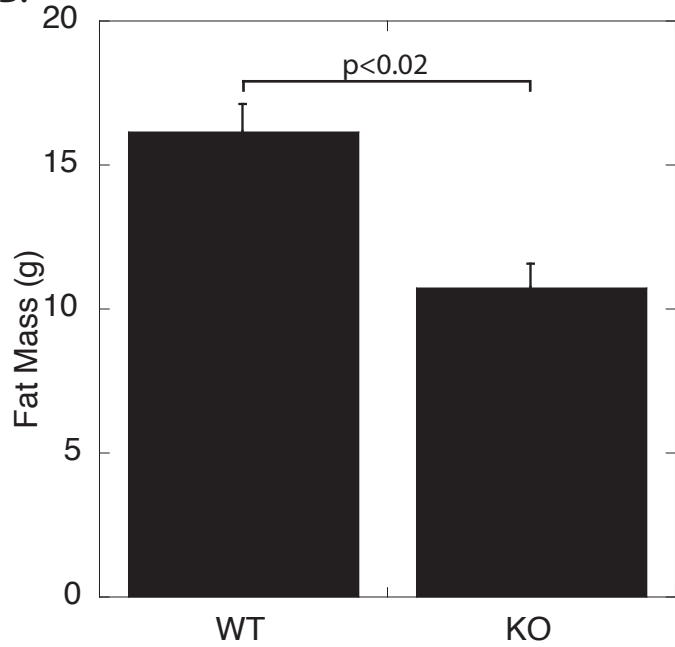

Supplement: pnas_0705407104_2.pdf [file pnas_0705407104_2.pdf]
